# Supplementary material for: Prostate-Specific Membrane Antigen (PSMA)-Positive Extracellular Vesicles in Urine—A Potential Liquid Biopsy Strategy for Prostate Cancer Diagnosis?
Source: MDPI journal article supplement (doi:10.3390/cancers14122987), 2022-06-17
Supplement: s1 [file s1]

Supporting information for:

# Prostate-specific membrane antigen (PSMA) -positive extracellular vesicles in urine - a potential liquid biopsy strategy for prostate cancer diagnosis?

Susann Allelein<sup>1\*</sup>, Keshia Aerschlimann<sup>1</sup>, Gundula Rösch<sup>2</sup>, Roxana Khajehamiri<sup>2</sup>, Andreas Kölsch<sup>1</sup>, Christian Freese<sup>2</sup>, Dirk Kuhlmeier<sup>1</sup>

<sup>1</sup> Affiliation: Fraunhofer Institute for Cell Therapy and Immunology (IZI) Leipzig, Germany

<sup>2</sup> Affiliation: Fraunhofer Institute for Microengineering and Microsystems (IMM) Mainz, Germany

\* Correspondence: susann.allelein@izi.fraunhofer.de;

**Keywords:** extracellular vesicles, prostate specific membrane antigen, microarray, immunomagnetic isolation, automated, prostate cancer

**Table S1.** Cohort characteristics of PCa patients and benign male controls. The risk group corresponds to the Gleason Score (GS) determined after prostate tissue biopsy.

| RISK         | #  | AGE | PSA [ng/mL] | CREATININE [mmol/L] | GS | PROSTATE V [mL] |
|--------------|----|-----|-------------|---------------------|----|-----------------|
| benign       | 1  | 56  | 14.11       | 23.99               |    | 126             |
| benign       | 2  | 53  | 20.20       | 14.04               |    | 63              |
| benign       | 3  | 66  | 3.89        | 2.55                |    | 70              |
| benign       | 4  | 67  | 2.99        | 0.38                |    | 100             |
| benign       | 5  | 78  | 0.95        | 0.62                |    | 24              |
| benign       | 6  | 74  | 3.50        | 2.45                |    | 87              |
| benign       | 7  | 74  | 6.00        | 7.03                |    | 50              |
| benign       | 8  | 70  | 10.00       | 5.08                |    | 90              |
| benign       | 9  | 66  | 2.25        | 20.17               |    | 40              |
| benign       | 10 | 68  | 7.40        | 11.75               |    | 120             |
| benign       | 11 | 58  | 11.70       | 18.31               |    | 70              |
| benign       | 12 | 72  | 0.93        | 2.25                |    | 130             |
| benign       | 13 | 56  | 8.00        | 32.66               |    | 70              |
| benign       | 14 | 66  | 5.05        | 30.77               |    | 51              |
| benign       | 15 | 78  | 5.50        | 7.78                |    | 75              |
| benign       | 16 | 68  | 17.70       | 4.70                | 6  | 128             |
| low          | 1  | 66  | 9.79        | 5.34                |    | 110             |
| low          | 2  | 54  | 1.10        | 6.33                |    | 60              |
| low          | 3  | 77  | 2.60        | 5.75                |    | 50              |
| low          | 4  | 56  | 5.00        | 15.94               | 6  | 30              |
| low          | 5  | 62  | 7.00        | 6.48                | 6  | 30              |
| intermediate | 1  | 55  | 12.20       | 14.21               | 7a | 25              |
| intermediate | 2  | 68  | 5.86        | 13.97               | 7a | 70              |
| intermediate | 3  | 67  | 12.60       | 7.26                | 7a | 120             |

|              |    |    |       |       |    |     |
|--------------|----|----|-------|-------|----|-----|
| intermediate | 4  | 63 | 12.90 | 8.99  | 6  | 60  |
| intermediate | 5  | 77 | 7.67  | 13.66 | 7a | 30  |
| intermediate | 6  | 56 | 4.80  | 18.46 | 7  | 40  |
| intermediate | 7  | 75 | 12.70 | 20.40 | 7  | 15  |
| intermediate | 8  | 73 | 4.20  | 10.77 | 7  | 18  |
| intermediate | 9  | 78 | 6.10  | 10.78 | 7  | 10  |
| intermediate | 10 | 74 | 5.00  | 8.92  | 7  | 35  |
| intermediate | 11 | 63 | 5.12  | 15.59 | 7  | 40  |
| intermediate | 13 | 62 | 5.29  | 7.97  | 7  | 66  |
| intermediate | 14 | 76 | 8.44  | 8.86  | 7  | 45  |
| intermediate | 15 | 63 | 14.50 | 6.36  | 7  | 55  |
| high         | 1  | 58 | 6.60  | 20.48 | 7  | 25  |
| high         | 2  | 67 | 7.30  | 3.9   | 8  | 94  |
| high         | 3  | 71 | 6.80  | 15.58 | 9  | 60  |
| high         | 4  | 62 | 6.71  | 3.95  | 9  | 30  |
| high         | 5  | 69 | 34.50 | 3.01  | 9  | 240 |
| high         | 6  | 71 | 5.40  | 1.21  | 9  | 20  |
| high         | 7  | 67 | 28.00 | 1.92  | 8  | 77  |

**Table S2.** Cohort characteristics of healthy female and male controls.

| #  | SEX    | #  | AGE | CREATININE [ $\mu\text{mol/L}$ ] |
|----|--------|----|-----|----------------------------------|
| 1  | female | 1  | 35  | 24850                            |
| 2  | female | 2  | 27  | 24730                            |
| 3  | female | 3  | 30  | 1603                             |
| 4  | female | 4  | 34  | 1963                             |
| 5  | female | 5  | 32  | 1176                             |
| 6  | male   | 6  | 22  | 2724                             |
| 7  | male   | 7  | 36  | 2552                             |
| 8  | male   | 8  | 29  | 3950                             |
| 9  | male   | 9  | 29  | 21782                            |
| 10 | male   | 10 | 29  | 16070                            |

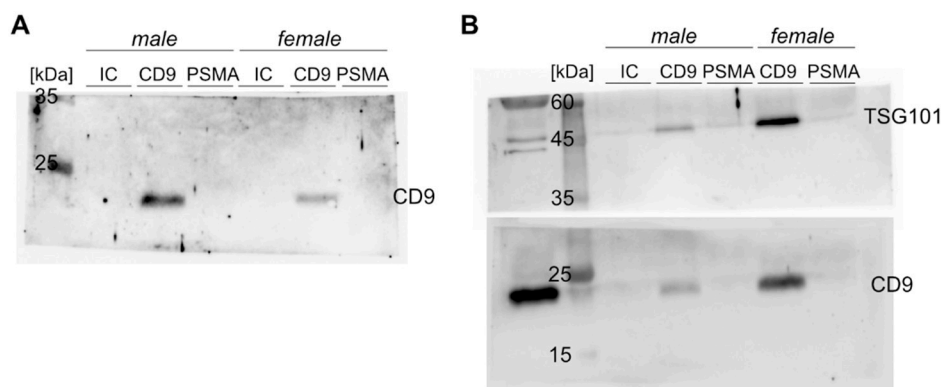

**Figure S1.** Specific uEV isolation using immunomagnetic beads. Western blot analysis for CD9 and/or TSG101 of CD9- or PSMA-positive uEVs and the isotype control (IC) from female and male intermediate PCa risk urine from patient intermediate 15 (A) and 3 (B).

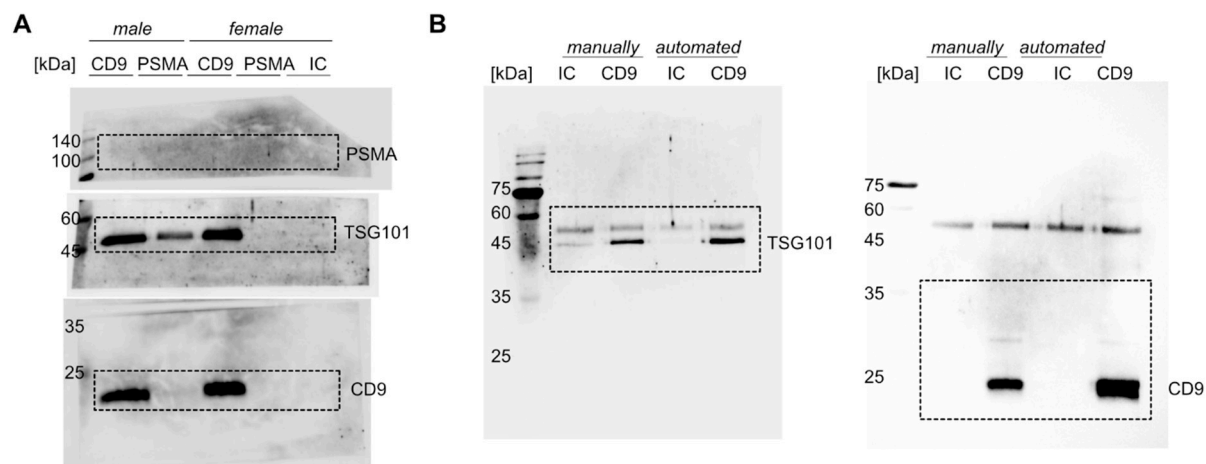

**Figure S2.** Western blot images for specific uEV isolation using immunomagnetic beads with cropped areas indicated by dashed lines used in figure 2. Antibody incubation on membrane cuts according to the molecular weight of the investigated protein.

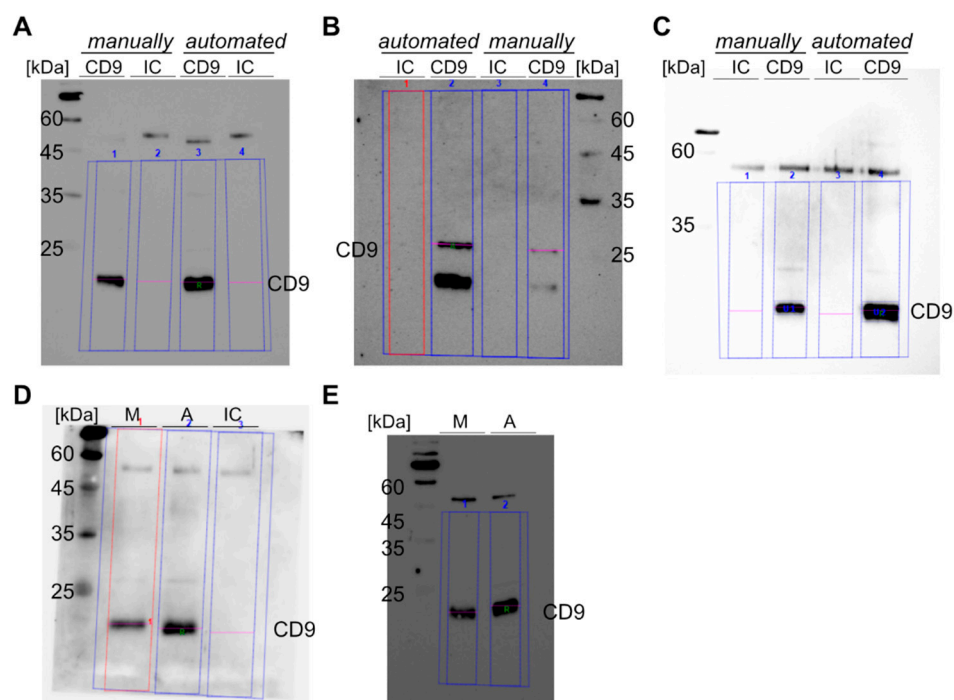

**Figure S3.** Western blot analysis of CD9 from specific uEV immunomagnetic isolation by manually (M) and automated (A) performed procedure targeting the isotype control (IC) or CD9 (A -C) or a mix of CD63 and CD81 (D, E) from 5 mL of cell-free urine. Relative band intensities of CD9 analyzed in Image Lab software (Bio-Rad Laboratories) and summarized in Fig. 2.

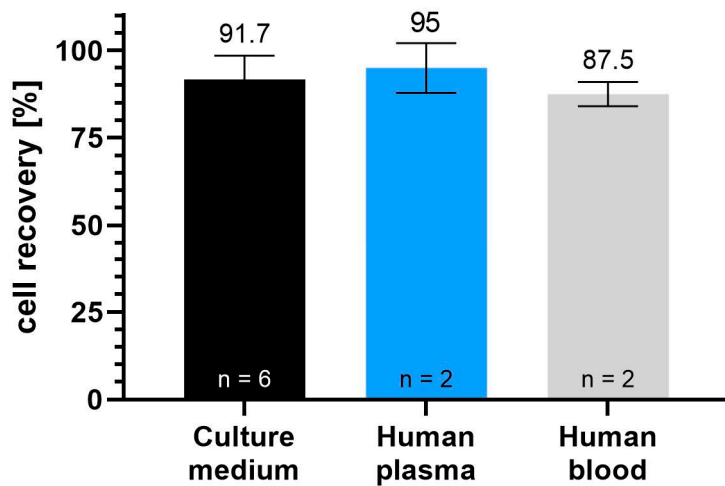

**Figure S4.** Characterization of the IsoMAG-ONE10.0 isolation system. For testing the functionality and the optimal isolation parameters, such as number of washing steps, buffers used, mixing times and volumes, enrichment of cells from cell culture medium, human plasma and whole blood was performed. For this purpose, 20 fluorescently stained cells were added to the enrichment medium and the cells were automatically enriched with EpCAM-coated Dynabeads. After enrichment, the cell number of the enriched cells was determined and the percentages calculated in relation to the 20 previously added cells. This protocol did not only show best enrichment properties but also lowest loss of beads during the process which is of importance for the isolation of EVs as demonstrated in Fig. 3.

**Table S3.** Assay parameters for IsoMAG-ONE10.0 (duration: 1:34 h)

| No. | Step             | Description                              |
|-----|------------------|------------------------------------------|
| 1   | Reset all axes   | Required                                 |
| 2   | Take pipette     | Take 10ml pipette                        |
| 3   | Move to well 1   | 5ml + 100 µl <i>Beads</i> in 6ml tube    |
| 4   | Prepare pipette  | Pump 0,5ml air                           |
| 5   | Dive in pipette  | Dive in fluid                            |
| 6   | Mixing           | 30min; 20ml/min                          |
| 7   | Get <i>Beads</i> | Magnet to pipette and release fluid; 60s |
| 8   | Move to well 2   | 4ml in 6ml tube                          |
| 9   | Prepare pipette  | Pump 0,5ml air                           |
| 10  | Dive in pipette  | Dive in fluid                            |
| 11  | Peel off         | 10x; 20ml/min; 1,1ml                     |
| 12  | Washing          | 20x ; 20ml/min                           |
| 13  | Get <i>Beads</i> | Magnet to pipette and release fluid; 60s |
| 14  | Move to well 3   | 4ml in 6ml tube                          |
| 15  | Prepare pipette  | Pump 0,5ml air                           |
| 16  | Dive in pipette  | Dive in fluid                            |
| 17  | Peel off         | 10x; 20ml/min; 1,1ml                     |
| 18  | Washing          | 20x ; 20ml/min                           |
| 19  | Get <i>Beads</i> | Magnet to pipette and release fluid; 60s |
| 20  | Move to well 4   | 1ml in 2ml tube                          |
| 21  | Prepare pipette  | Pump 0,5ml air                           |

|    |                  |                                           |
|----|------------------|-------------------------------------------|
| 22 | Dive in pipette  | Dive in fluid                             |
| 23 | Washing          | 25x ; 20ml/min                            |
| 24 | Release Fluid    | Release fluid from pipette without magnet |
| 25 | Drop pipette     | Drop 10ml pipette                         |
| 26 | Take pipette     | Take 1,25ml pipette                       |
| 27 | Move to well 4   | 1ml in 2ml tube                           |
| 28 | Prepare pipette  | Pump 0,5ml air                            |
| 29 | Dive in pipette  | Dive in fluid                             |
| 30 | Mixing           | 5x; 5ml/min                               |
| 31 | Get <i>Beads</i> | Magnet to pipette and release fluid; 60s  |
| 32 | Move to well 5   | 0,2ml in 1,9 ml tube                      |
| 33 | Prepare pipette  | Pump 0,5ml air                            |
| 34 | Dive in pipette  | Dive in fluid                             |
| 35 | Washing          | 30x ; 2 ml/min                            |
| 36 | Release Fluid    | Release fluid from pipette without magnet |
| 37 | Drop pipette     | Drop 1,25ml pipette                       |
